# Supplementary material for: [Retracted] Evaluation of a Novel Quality of Life Scale for Schoolchildren with Nonstrabismic Binocular Vision Anomalies
Source: Hindawi journal article supplement (doi:10.1155/2020/4723402), 2020-01-01
Supplement: f1 [file 4723402.f1.docx]

Table S1 The detailed content of QOL-CVF20

| No. | items | Results | | | | | Total  Score |
| --- | --- | --- | --- | --- | --- | --- | --- |
| Never | Rarely | Sometimes | Often | Always |
| 1 | Are your eyes close to the book when reading and writing? |  |  |  |  |  |  |
| 2 | Dose the occurrence of words-skip or lines-skip happen when reading or writing? |  |  |  |  |  |  |
| 3 | Dose the occurrence of words-skip or lines-skip happen when doing the copying from the blackboard? |  |  |  |  |  |  |
| 4 | Dose the occurrence of double image happen when reading or seeing anything? |  |  |  |  |  |  |
| 5 | Do you feel difficult to hit the ping-pong or catch the frisbee when playing ping pong or frisbee? |  |  |  |  |  |  |
| 6 | Do your eyes become sore or blurred after reading for a short time? |  |  |  |  |  |  |
| 7 | Do your eyes feel tired, dry, or afraid of light? |  |  |  |  |  |  |
| 8 | Do you squint, blink frequently or head-tilt look thing? |  |  |  |  |  |  |
| 9 | Do your eyes feel blurred in dim light? |  |  |  |  |  |  |
| 10 | Do you feel the ground unevenness when walking around? |  |  |  |  |  |  |
| 11 | Do you feel difficult to independently dress, fasten the button or tie your shoes? |  |  |  |  |  |  |
| 12 | Do you feel uncomfortable to go to toilet in school? Or are you trying not to go to toilet at school? |  |  |  |  |  |  |
| 13 | Can you eat independently and intently? |  |  |  |  |  |  |
| 14 | Do you think the teachers are good to you? |  |  |  |  |  |  |
| 15 | Do you think your classmates like to play with you? |  |  |  |  |  |  |
| 16 | Would you like to take part in collective activities of the school? |  |  |  |  |  |  |
| 17 | Do you think your parents care about you? |  |  |  |  |  |  |
| 18 | Do you have confidence to finish your homework assigned by the teachers? |  |  |  |  |  |  |
| 19 | Do you feel happy to go to school? |  |  |  |  |  |  |
| 20 | Do you feel happy in your life? |  |  |  |  |  |  |

The definition of score: From item 1 to item 12, always=1, often=2, sometimes=3, less=4, and never=5. From item 13 to item 20, always=5, often=4, sometimes=3, less=2, and never=1.
